# Supplementary material for: Successful initial high-dose tofacitinib treatment for acute severe ulcerative colitis with steroid resistance: A case series
Source: Research Square preprint supplement (doi:10.21203/rs.3.rs-1427462/v1), 2022-03-23
Supplement: Supplementary file 1 [file d3ae833251244747abbfb5b8.xls]

## Sheet: Sheet1
Patient	Sex	Age, years	UC duration, years	Previous treatment	Disease type	Admission	Tofacitinib effect	Discharge (remission)	Stool frequency	Rectal bleeding	Mucosal appearance	Physician's rating of disease activity	UCDAI	Mayo score	MES	CRP, mg/L	Alb, g/dL	Hb, g/dL	Complication
1	Male	60	7	5-ASA intolerance, AZA	Total colitis	2020-02-01	Response	2020-03-03	15	3＋	3＋	3＋	12	12	3	193	1.8	8.4	None
2	Female	19	First onset	None	Total colitis	2020-05-16	No response	2020-06-25	10	3＋	3＋	3+	12	12	3	71	2	4.7	None
3	Female	53	20	5-ASA	Total colitis	2018-10-24	Response	2018-12-14	10	3＋	3＋	3＋	12	12	3	7	2.7	8.6	None
4	Female	52	2	5-ASA	Total colitis	2019-08-01	Response	2019-09-18	15	3＋	3＋	3＋	12	12	3	241	1.3	6.3	Herpes zoster
5	Male	65	First onset	None	Total colitis	2019-11-14	Response	2019-12-08	15	3＋	3＋	3＋	12	12	3	30	2.7	9.3	None
6	Male	20	3	5-ASA intolerance, none	Total colitis	2019-11-25	No response	2019-12-25	15	3＋	3＋	3＋	12	12	3	204	2	10.4	None
7	Male	57	First onset	None	Total colitis	2020-11-18	Response	2020-12-26	10	3＋	3＋	3＋	12	12	3	158	2.1	8.7	None
8	Female	51	First onset	None	Total colitis	2021-01-30	Response	2021-02-27	15	3＋	3＋	3＋	12	12	3	56	1.4	9.6	None
5-ASA, 5-aminosalicylic acid; Alb, albumin; AZA, azathioprine; CRP, C-reactive protein; Hb, hemoglobin; UCDAI, ulcerative Colitis Disease Activity Index; MES, Mayo endoscopic subscore
